# Supplementary material
Source: publisher site journal article supplement (http://kjim.org/upload/media/kjim-2020-135-suppl2.pdf)
Supplement: Supplementary file 1 [file kjim-2020-135-suppl2.pdf]

**Supplementary Table 2. Clinical outcomes of study patients according to treatment at discharge and during follow-up**

|                                                                               | Vasodilating<br>β-blockers<br>(n = 3,608) | Conventional<br>β-blockers<br>(n = 3,661) | Unadjusted<br>HR<br>(95% CI) | p value | Adjusted <sup>a</sup><br>HR<br>(95% CI) | p value |
|-------------------------------------------------------------------------------|-------------------------------------------|-------------------------------------------|------------------------------|---------|-----------------------------------------|---------|
| Cardiac death, myocardial infarction,<br>or hospitalisation for heart failure | 282 (7.8)                                 | 359 (9.8)                                 | 0.79 (0.68–0.92)             | 0.003   | 0.80 (0.68–0.94)                        | 0.006   |
| Cardiac death                                                                 | 128 (3.5)                                 | 176 (4.8)                                 | 0.74 (0.59–0.92)             | 0.008   | 0.78 (0.61–0.99)                        | 0.038   |
| Myocardial infarction                                                         | 90 (2.5)                                  | 112 (3.1)                                 | 0.81 (0.61–1.07)             | 0.140   | 0.82 (0.62–1.09)                        | 0.174   |
| Hospitalisation for heart failure                                             | 100 (2.8)                                 | 115 (3.1)                                 | 0.88 (0.67–1.15)             | 0.336   | 0.86 (0.65–1.13)                        | 0.275   |

HR, hazard ratio; CI, confidence interval.

<sup>a</sup>Adjusted for age, sex, hypertension, diabetes mellitus, dyslipidemia, current or ex-smoking, chronic kidney disease, left main or left anterior descending as infarct related artery, multivessel disease, left ventricular ejection fraction, ST elevation myocardial infarction or non-ST elevation myocardial infarction, and use of renin angiotensin system blocker, statin.
